# Supplementary material for: Prognostic adjustment with efficient estimators to unbiasedly leverage historical data in randomized trials
Source: publisher site journal article supplement (doi:10.1515/ijb-2024-0018), 2025-03-10
Supplement: Supplementary file 1 [file j_ijb-2024-0018_suppl_001.pdf]

## Supplementary Material

Lauren D. Liao, Emilie Højbjerg-Frandsen, Alan E. Hubbard, and Alejandro Schuler\*

# Supplementary Material for the Article “Prognostic Adjustment with Efficient Estimators to Unbiasedly Leverage Historical Data in Randomized Trials”

## Appendix A Expectation calculation when incorporating unobserved covariate

By definition, an unobserved covariate  $U$  is never seen in real data but we include such a variable in simulation. We aim to demonstrate that even if the outcome model can be learned perfectly from historical data, if there exists an unobserved shift between the historical and trial sample, then the learned historical outcome model (prognostic model) can never be equivalent to the trial outcome model. We explicitly write out the expectation of the outcome  $Y$  given treatment  $A$ , baseline covariates  $W$ , and data set indicator  $D$  using an unobserved covariate  $U$ .

$$E[Y|A, W, D = d] = \int E[Y|A, W, U = u, D = d]p(u|A, W, D = d)du$$

A shift in the distribution  $p(u|A, W, D = 1) \neq p(u|A, W, D = 0)$  of the unobserved covariate  $U$  will generally result in unequal conditional expectations, i.e.,  $E[Y|A, W, D = 1] \neq E[Y|A, W, D = 0]$ .

This shift is the basis of the simulation for Figure 3.B. In our simulation, we have  $U|A, W, D = 1 \sim \text{Unif}(0, 1)$  and  $U|A, W, D = 0 \sim \text{Unif}(\underline{u}, \bar{u})$  where the limits *underline*( $u$ ), *overline*( $u$ ) increase or decrease past 0 or 1 depending on the desired magnitude of covariate shift. The “oracle” prognostic score is

---

**Lauren D. Liao, Alan E. Hubbard, Alejandro Schuler**, Division of Biostatistics, University of California, Berkeley, CA, USA

**Emilie Højbjerg-Frandsen**, Biostatistics Methods and Outreach, Novo Nordisk A/S, Denmark

given by  $E[Y|A, W, D = 1]$ , i.e. always integrating over the correct (trial) density  $U|A, W, D = 1 \sim \text{Unif}(0, 1)$ .

By framing shifts in the conditional mean as shifts in an unobserved covariate we can directly control the magnitude of the change instead of manually specifying different conditional mean functions.

## Appendix B Discrete super learner specifications for simulation and case study.

### Appendix B.1 Discrete super learner specifications

Machine learning is performed through discrete super learner that the targeted maximum likelihood estimator internally leverages. For simplicity, the prognostic model is built using the discrete super learner as well. A discrete super learner selects from a set of candidate models (i.e., the library) to obtain a single, best prediction model via cross-validation. In this section, we describe the exact tuning parameters and set up for the simulation and case study.

### Appendix B.2 Simulation set up

**Cross-validation:** 5-fold cross-validation is used to select the best candidate learner in the library for historical sample size 1,000, and 10-fold cross-validation for historical sample size less than 1,000.

**Cross-fit:** 5-fold Cross-fitting is employed.

**Discrete super learner library:** Multivariate Adaptive Regression Splines with the highest interaction to be to the 3rd degree, linear regression, extreme gradient boosting with specifications: learning rate 0.1, tree depth 3, crossed with trees specified 25 to 500 by 25 increments. Cases with *fitted* prognostic score include an augmented library that includes candidate learners with prognostic score in addition.

**Discrete super learner specifications:** loss function is specified to be the mean square error loss.

### Appendix B.3 Case study set up

**Cross-validation:** 20-fold cross-validation is used to select the best candidate learner in the library.

**Cross-fit:** 20-fold Cross-fitting is employed.

**Discrete super learner library:** Multivariate Adaptive Regression Splines with the highest interaction to be to the 3rd degree, logistic regression, extreme gradient boosting with specifications: learning rate 0.1, tree depths 3, 5, and 10, crossed with trees specified 25 to 500 by 25 increments, random forest with trees specified

25 to 500 by 25 increments, k-nearest neighbor of specification 3, 4, 5, 7, and 9 number of nearest neighbors, k. Cases with *fitted* prognostic score include an augmented library that includes candidate learners with prognostic score in addition to without.

**Discrete super learner specifications:** loss function is specified to be the mean log likelihood loss.

**Selected prognostic model:** The selected learner from 20-fold cross validation is a linear regression model for both the reanalyses with  $n = 419$  and  $n = 100$ . Details are written in Appendix H.

# Appendix C Simulation results for different data generation processes

**Tab. 1:** Mean of empirically estimated bias, variance, and standard errors of them for the targeted maximum likelihood estimator with or without prognostic score across different DGPs. For all the scenarios the conditional means are shared with the heterogeneous effect DGP, except for the constant effect DGP. Unless otherwise specified  $(\tilde{n}, n) = (1000, 250)$ .

| Scenario                                            | Estimator<br><i>prog.</i> | Bias   | Var.   | SE<br>Bias | SE<br>var. | RMSE  | Power | Coverage |
|-----------------------------------------------------|---------------------------|--------|--------|------------|------------|-------|-------|----------|
| heterogeneous effect                                | TMLE<br><i>none</i>       | -0.031 | 5.918  | 0.048      | 0.041      | 2.432 | 0.660 | 0.956    |
|                                                     | TMLE<br><i>fitted</i>     | -0.081 | 4.843  | 0.064      | 0.005      | 2.201 | 0.727 | 0.955    |
|                                                     | TMLE<br><i>oracle</i>     | -0.066 | 4.827  | 0.036      | 0.004      | 2.197 | 0.743 | 0.955    |
|                                                     | linear<br><i>none</i>     | -0.005 | 11.113 | 0.026      | 0.026      | 3.332 | 0.413 | 0.953    |
|                                                     | linear<br><i>fitted</i>   | -0.096 | 10.438 | 0.037      | 0.030      | 3.231 | 0.421 | 0.952    |
|                                                     | linear<br><i>oracle</i>   | -0.083 | 10.485 | 0.037      | 0.029      | 3.237 | 0.425 | 0.951    |
|                                                     | unadjusted<br><i>none</i> | -0.015 | 10.373 | 0.009      | 0.011      | 3.219 | 0.439 | 0.951    |
| heterogeneous effect<br><i>second specification</i> | TMLE<br><i>none</i>       | 0.052  | 0.929  | -0.003     | 0.008      | 0.965 | 0.788 | 0.943    |
|                                                     | TMLE<br><i>fitted</i>     | 0.056  | 0.886  | 0.005      | 0.006      | 0.942 | 0.811 | 0.947    |
|                                                     | TMLE<br><i>oracle</i>     | 0.050  | 0.893  | -0.006     | 0.006      | 0.946 | 0.813 | 0.943    |
|                                                     | linear<br><i>none</i>     | 0.077  | 1.400  | 0.020      | 0.008      | 1.185 | 0.598 | 0.947    |
|                                                     | linear<br><i>fitted</i>   | 0.016  | 0.980  | 0.025      | 0.003      | 0.990 | 0.740 | 0.951    |
|                                                     | linear<br><i>oracle</i>   | 0.014  | 0.993  | 0.010      | 0.003      | 0.996 | 0.745 | 0.949    |
|                                                     | unadjusted<br><i>none</i> | 0.060  | 1.350  | -0.002     | 0.010      | 1.163 | 0.615 | 0.952    |
| constant effect                                     | TMLE<br><i>none</i>       | 0.024  | 0.108  | -0.001     | 0.000      | 0.330 | 0.656 | 0.945    |
|                                                     | TMLE<br><i>fitted</i>     | 0.015  | 0.075  | 0.010      | 0.000      | 0.274 | 0.790 | 0.956    |
|                                                     | TMLE<br><i>oracle</i>     | 0.011  | 0.073  | 0.004      | 0.000      | 0.271 | 0.816 | 0.958    |
|                                                     | linear<br><i>none</i>     | 0.043  | 0.406  | 0.030      | 0.001      | 0.639 | 0.200 | 0.948    |
|                                                     | linear<br><i>fitted</i>   | 0.015  | 0.070  | 0.012      | 0.000      | 0.265 | 0.814 | 0.964    |
|                                                     | linear<br><i>oracle</i>   | 0.017  | 0.064  | 0.011      | 0.000      | 0.254 | 0.849 | 0.963    |
|                                                     | unadjusted<br><i>none</i> | 0.010  | 0.815  | -0.015     | 0.001      | 0.903 | 0.153 | 0.941    |
| small observed shift                                | TMLE<br><i>none</i>       | -0.081 | 5.757  | 0.080      | 0.042      | 2.400 | 0.648 | 0.959    |

Continuation of Table 1

| Scenario                                                   | Estimator<br><i>prog.</i> | Bias   | Var.   | SE<br>Bias | SE<br>var. | RMSE  | Power | Coverage |
|------------------------------------------------------------|---------------------------|--------|--------|------------|------------|-------|-------|----------|
|                                                            | TMLE                      | -0.133 | 5.513  | 0.058      | 0.039      | 2.350 | 0.686 | 0.950    |
|                                                            | <i>fitted</i>             |        |        |            |            |       |       |          |
|                                                            | TMLE                      | -0.098 | 4.918  | 0.014      | 0.004      | 2.219 | 0.738 | 0.959    |
|                                                            | <i>oracle</i>             |        |        |            |            |       |       |          |
|                                                            | linear                    | -0.068 | 11.084 | 0.027      | 0.028      | 3.328 | 0.409 | 0.951    |
|                                                            | <i>none</i>               |        |        |            |            |       |       |          |
|                                                            | linear                    | -0.061 | 11.147 | 0.023      | 0.028      | 3.338 | 0.407 | 0.950    |
|                                                            | <i>fitted</i>             |        |        |            |            |       |       |          |
|                                                            | linear                    | -0.125 | 10.429 | 0.041      | 0.031      | 3.230 | 0.426 | 0.947    |
|                                                            | <i>oracle</i>             |        |        |            |            |       |       |          |
|                                                            | unadjusted                | -0.078 | 10.683 | -0.043     | 0.011      | 3.268 | 0.439 | 0.946    |
|                                                            | <i>none</i>               |        |        |            |            |       |       |          |
| small unobserved shift                                     | TMLE                      | -0.084 | 6.257  | -0.028     | 0.039      | 2.502 | 0.642 | 0.948    |
|                                                            | <i>none</i>               |        |        |            |            |       |       |          |
|                                                            | TMLE                      | -0.121 | 5.761  | 0.001      | 0.015      | 2.402 | 0.661 | 0.949    |
|                                                            | <i>fitted</i>             |        |        |            |            |       |       |          |
|                                                            | TMLE                      | -0.102 | 4.989  | -0.003     | 0.004      | 2.235 | 0.718 | 0.956    |
|                                                            | <i>oracle</i>             |        |        |            |            |       |       |          |
|                                                            | linear                    | -0.049 | 10.546 | 0.112      | 0.026      | 3.246 | 0.401 | 0.955    |
|                                                            | <i>none</i>               |        |        |            |            |       |       |          |
|                                                            | linear                    | -0.105 | 10.170 | 0.121      | 0.026      | 3.189 | 0.405 | 0.955    |
|                                                            | <i>fitted</i>             |        |        |            |            |       |       |          |
|                                                            | linear                    | -0.105 | 9.934  | 0.123      | 0.030      | 3.152 | 0.419 | 0.956    |
|                                                            | <i>oracle</i>             |        |        |            |            |       |       |          |
|                                                            | unadjusted                | -0.035 | 9.879  | 0.083      | 0.011      | 3.142 | 0.429 | 0.947    |
|                                                            | <i>none</i>               |        |        |            |            |       |       |          |
| small historical sample<br>( $\tilde{n}, n$ ) = (100, 250) | TMLE                      | 0.055  | 6.042  | 0.008      | 0.033      | 2.457 | 0.687 | 0.950    |
|                                                            | <i>none</i>               |        |        |            |            |       |       |          |
|                                                            | TMLE                      | 0.009  | 5.996  | -0.017     | 0.026      | 2.447 | 0.677 | 0.947    |
|                                                            | <i>fitted</i>             |        |        |            |            |       |       |          |
|                                                            | TMLE                      | 0.007  | 4.916  | 0.018      | 0.004      | 2.216 | 0.739 | 0.945    |
|                                                            | <i>oracle</i>             |        |        |            |            |       |       |          |
|                                                            | linear                    | 0.120  | 11.066 | 0.030      | 0.026      | 3.327 | 0.412 | 0.954    |
|                                                            | <i>none</i>               |        |        |            |            |       |       |          |
|                                                            | linear                    | 0.054  | 10.940 | 0.001      | 0.029      | 3.306 | 0.415 | 0.950    |
|                                                            | <i>fitted</i>             |        |        |            |            |       |       |          |
|                                                            | linear                    | 0.042  | 10.812 | -0.012     | 0.028      | 3.287 | 0.426 | 0.952    |
|                                                            | <i>oracle</i>             |        |        |            |            |       |       |          |
|                                                            | unadjusted                | 0.058  | 10.415 | 0.004      | 0.011      | 3.226 | 0.451 | 0.957    |
|                                                            | <i>none</i>               |        |        |            |            |       |       |          |
| small trial sample<br>( $\tilde{n}, n$ ) = (1000, 100)     | TMLE                      | 0.088  | 29.818 | -0.150     | 0.208      | 5.459 | 0.216 | 0.944    |
|                                                            | <i>none</i>               |        |        |            |            |       |       |          |
|                                                            | TMLE                      | -0.028 | 14.931 | -0.152     | 0.042      | 3.862 | 0.361 | 0.947    |
|                                                            | <i>fitted</i>             |        |        |            |            |       |       |          |
|                                                            | TMLE                      | 0.004  | 14.034 | -0.103     | 0.041      | 3.744 | 0.377 | 0.949    |
|                                                            | <i>oracle</i>             |        |        |            |            |       |       |          |
|                                                            | linear                    | 0.098  | 35.371 | -0.239     | 0.273      | 5.945 | 0.206 | 0.931    |
|                                                            | <i>none</i>               |        |        |            |            |       |       |          |
|                                                            | linear                    | -0.044 | 34.146 | -0.278     | 0.300      | 5.841 | 0.198 | 0.929    |
|                                                            | <i>fitted</i>             |        |        |            |            |       |       |          |
|                                                            | linear                    | -0.022 | 34.290 | -0.276     | 0.296      | 5.853 | 0.199 | 0.934    |
|                                                            | <i>oracle</i>             |        |        |            |            |       |       |          |
|                                                            | unadjusted                | 0.232  | 27.199 | -0.109     | 0.061      | 5.218 | 0.228 | 0.945    |
|                                                            | <i>none</i>               |        |        |            |            |       |       |          |

# Appendix D Empirical standard error estimates

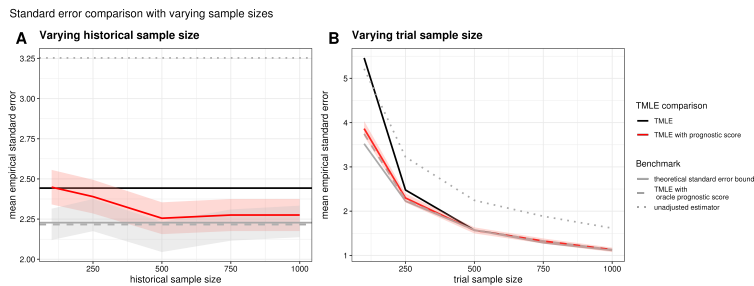

**Fig. 1:** Mean empirical standard errors across estimators when historical and trial sample sizes are varied using the heterogeneous DGP. When the historical sample size is varied (Appendix Figure 1.A), the trial is fixed at  $n = 250$ . When the trial size is varied (Appendix Figure 1.B), the historical sample is fixed at  $\tilde{n} = 1000$ . We show the standard errors with 95% confidence interval for the Monte Carlo simulation as shown in Morris et. al (2019) (1).

Appendix E Case study data summary

| Data name  | Trial ID    | Duration  | Titration target (mmol/L) | Blinding type  | Number of participants |           |
|------------|-------------|-----------|---------------------------|----------------|------------------------|-----------|
|            |             |           |                           |                | randomized             | completed |
| New RCT    | NN9068-4229 | 26 weeks  | 4.0-5.0                   | Open-label     | 210                    | 206       |
|            | NN9068-4228 | 104 weeks | 4.0-5.0                   | Open-label     | 504                    | 481       |
|            | NN1250-3579 | 52 weeks  | 4.0-5.0                   | Open-label     | 257                    | 197       |
|            | NN1250-3586 | 26 weeks  | 4.0-5.0                   | Open-label     | 146                    | 136       |
|            | NN1250-3672 | 26 weeks  | 4.0-5.0                   | Open-label     | 230                    | 201       |
|            | NN1250-3718 | 26 weeks  | 4.0-5.0                   | Open-label     | 234                    | 209       |
|            | NN1250-3724 | 26 weeks  | 4.0-5.0                   | Open-label     | 230                    | 206       |
|            | NN1250-3587 | 26 weeks  | 4.0-5.0                   | Open-label     | 278                    | 254       |
|            | NN9535-3625 | 30 weeks  | 4.0-5.5                   | Open-label     | 365                    | 343       |
| Historical | NN2211-1697 | 26 weeks  | < 5.0                     | Double-blinded | 34                     | 219       |
|            | NN5401-3590 | 26 weeks  | 3.9-5.0                   | Open-label     | 264                    | 232       |
|            | NN5401-3726 | 26 weeks  | 3.9-5.0                   | Open-label     | extension of 3590      | 209       |
|            | NN5401-3896 | 26 weeks  | 3.9-5.0                   | Open-label     | 149                    | 137       |
|            | NN1436-4383 | 26 weeks  | 4.4-7.2                   | Double-blinded | 122                    | 119       |
|            | NN1436-4465 | 16 weeks  | 4.4-7.2                   | Open-label     | 51                     | 51        |
|            | NN1436-4477 | 78 weeks  | 4.4-7.2                   | Open-label     | 492                    | 477       |

**Tab. 2:** Summary of case study data provided by Novo Nordisk A/S. The new RCT data is highlighted in grey. The historical data consists of all the data sets that are not highlighted. The number of participants refers to the number of participants receiving the existing daily insulin treatment IGLar.



# Appendix F Summary of continuous measurements of the baseline

**Tab. 3:** Summary of the continuous baseline covariates.

|                                       | Historical sample | New random trial sample |
|---------------------------------------|-------------------|-------------------------|
| sample size                           | 3311              | 419                     |
| age (years)                           |                   |                         |
| N                                     | 3311              | 419                     |
| mean (SD)                             | 57.34 (9.92)      | 56.67 (10.28)           |
| median                                | 58.00             | 58.00                   |
| min; max                              | 21.00; 85.00      | 25.00; 83.00            |
| alanine aminotransferase (U/L)        |                   |                         |
| N                                     | 3303              | 419                     |
| mean (SD)                             | 29.51 (17.97)     | 26.63 (15.48)           |
| median                                | 25.00             | 23.00                   |
| min; max                              | 2.50; 333.00      | 6.00; 138.00            |
| albumin (g/dL)                        |                   |                         |
| N                                     | 3306              | 419                     |
| mean (SD)                             | 4.48 (0.28)       | 4.51 (0.25)             |
| median                                | 4.50              | 4.50                    |
| min; max                              | 2.50; 5.90        | 3.80; 5.20              |
| alkaline phosphatase (U/L)            |                   |                         |
| N                                     | 3305              | 419                     |
| mean (SD)                             | 75.99 (23.50)     | 71.82 (22.31)           |
| median                                | 73.00             | 68.00                   |
| min; max                              | 19.00; 261.00     | 20.00; 196.00           |
| aspartate aminotransferase (U/L)      |                   |                         |
| N                                     | 3299              | 419                     |
| mean (SD)                             | 23.22 (12.13)     | 21.38 (9.86)            |
| median                                | 20.00             | 19.00                   |
| min; max                              | 6.00; 227.00      | 6.00; 89.00             |
| basophils blood (%)                   |                   |                         |
| N                                     | 3284              | 419                     |
| mean (SD)                             | 0.53 (0.38)       | 0.39 (0.22)             |
| median                                | 0.40              | 0.40                    |
| min; max                              | 0.00; 4.40        | 0.00; 1.60              |
| body mass index (kg/m <sup>2</sup> )  |                   |                         |
| N                                     | 3309              | 419                     |
| mean (SD)                             | 30.72 (5.69)      | 31.22 (4.82)            |
| median                                | 30.22             | 31.00                   |
| min; max                              | 16.01; 56.39      | 20.00; 43.30            |
| body weight (kg)                      |                   |                         |
| N                                     | 3309              | 419                     |
| mean (SD)                             | 86.27 (19.82)     | 88.30 (17.41)           |
| median                                | 84.90             | 86.30                   |
| min; max                              | 36.30; 171.70     | 50.98; 145.33           |
| change from baseline to week 26 HbA1c |                   |                         |
| N                                     | 2642              | 399                     |
| mean (SD)                             | -1.48 (1.01)      | -1.81 (1.01)            |
| median                                | -1.40             | -1.70                   |
| min; max                              | -5.30; 2.60       | -6.20 ; 1.20            |

Continuation of Table 3

|                                               | Historical sample | New random trial sample |
|-----------------------------------------------|-------------------|-------------------------|
| creatinine (umol/L)                           |                   |                         |
| N                                             | 3308              | 419                     |
| mean (SD)                                     | 74.14 (18.56)     | 73.60 (15.64)           |
| median                                        | 72.00             | 72.00                   |
| min; max                                      | 23.00; 409.00     | 36.00; 121.00           |
| diabetes duration (years)                     |                   |                         |
| N                                             | 3311              | 419                     |
| mean (SD)                                     | 9.67 (6.36)       | 9.55 (6.26)             |
| median                                        | 8.67              | 8.47                    |
| min; max                                      | 0.30; 49.65       | 0.44; 34.24             |
| diastolic blood pressure (mmHg)               |                   |                         |
| N                                             | 3309              | 419                     |
| mean (SD)                                     | 78.85 (8.53)      | 79.12 (8.37)            |
| median                                        | 80.00             | 80.00                   |
| min; max                                      | 47.00; 116.00     | 57.00; 109.00           |
| eosinophils Blood (%)                         |                   |                         |
| N                                             | 3284              | 419                     |
| mean (SD)                                     | 2.65 (2.35)       | 2.56 (2.06)             |
| median                                        | 2.10              | 2.00                    |
| min; max                                      | 0.00; 43.70       | 0.00; 15.20             |
| erythrocytes (10 <sup>12</sup> /L)            |                   |                         |
| N                                             | 3297              | 419                     |
| mean (SD)                                     | 4.68 (0.45)       | 5.08 (0.48)             |
| median                                        | 4.70              | 5.00                    |
| min; max                                      | 3.10; 7.40        | 3.60; 7.50              |
| fasting plasma glucose (mmol/L)               |                   |                         |
| N                                             | 3268              | 411                     |
| mean (SD)                                     | 9.81 (2.65)       | 9.55 (2.53)             |
| median                                        | 9.50              | 9.20                    |
| min; max                                      | 2.70; 22.60       | 3.60; 29.20             |
| haematocrit blood (%)                         |                   |                         |
| N                                             | 3264              | 419                     |
| mean (SD)                                     | 42.49 (4.16)      | 45.28 (4.24)            |
| median                                        | 42.50             | 45.50                   |
| min; max                                      | 22.80; 60.50      | 31.20; 58.40            |
| hemoglobin A1C at baseline (%)                |                   |                         |
| N                                             | 3311              | 419                     |
| mean (SD)                                     | 8.39 (0.92)       | 8.28 (1.01)             |
| median                                        | 8.30              | 8.10                    |
| min; max                                      | 6.60; 12.80       | 6.50; 13.50             |
| high density lipoprotein cholesterol (mmol/L) |                   |                         |
| N                                             | 3277              | 410                     |
| mean (SD)                                     | 1.18 (0.33)       | 1.21 (0.35)             |
| median                                        | 1.14              | 1.14                    |
| min; max                                      | 0.21; 3.99        | 0.31; 2.69              |
| height (m)                                    |                   |                         |
| N                                             | 3311              | 419                     |
| mean (SD)                                     | 1.67 (0.10)       | 1.68 (0.09)             |
| median                                        | 1.67              | 1.68                    |
| min; max                                      | 1.36; 2.03        | 1.43; 2.01              |
| low density lipoprotein cholesterol (mmol/L)  |                   |                         |
| N                                             | 3270              | 409                     |
| mean (SD)                                     | 2.46 (0.94)       | 2.42 (1.01)             |

Continuation of Table 3

|                                   | Historical sample | New random trial sample |
|-----------------------------------|-------------------|-------------------------|
| median                            | 2.36              | 2.28                    |
| min; max                          | 0.00; 6.73        | 0.10; 7.10              |
| leukocytes (10 <sup>9</sup> /L)   |                   |                         |
| N                                 | 3297              | 419                     |
| mean (SD)                         | 7.33 (1.93)       | 7.93 (2.04)             |
| median                            | 7.10              | 7.80                    |
| min; max                          | 2.80; 17.60       | 3.60; 15.80             |
| lymphocytes blood (%)             |                   |                         |
| N                                 | 3284              | 419                     |
| mean (SD)                         | 30.00 (7.88)      | 29.39 (7.66)            |
| median                            | 29.70             | 28.70                   |
| min; max                          | 4.60; 71.00       | 10.70; 55.10            |
| monocytes blood (%)               |                   |                         |
| N                                 | 3284              | 419                     |
| mean (SD)                         | 5.88 (2.19)       | 5.83 (2.30)             |
| median                            | 5.70              | 5.70                    |
| min; max                          | 0.00; 21.70       | 0.50; 17.20             |
| neutrophils blood (%)             |                   |                         |
| N                                 | 3284              | 419                     |
| mean (SD)                         | 60.93 (8.68)      | 61.83 (9.00)            |
| median                            | 61.10             | 62.20                   |
| min; max                          | 16.60; 91.60      | 25.20; 86.50            |
| potassium (mmol/L)                |                   |                         |
| N                                 | 3304              | 419                     |
| mean (SD)                         | 4.48 (0.42)       | 4.53 (0.41)             |
| median                            | 4.49              | 4.50                    |
| min; max                          | 3.10; 7.00        | 3.30; 6.50              |
| pulse (beats/min)                 |                   |                         |
| N                                 | 3310              | 419                     |
| mean (SD)                         | 75.31 (10.00)     | 75.56 (9.34)            |
| median                            | 75.00             | 76.00                   |
| min; max                          | 45.50; 118.00     | 52.00; 108.00           |
| sodium (mmol/L)                   |                   |                         |
| N                                 | 3303              | 419                     |
| mean (SD)                         | 139.73 (2.81)     | 140.19 (2.44)           |
| median                            | 140.00            | 140.00                  |
| min; max                          | 121.00; 154.00    | 132.00; 148.00          |
| systolic blood pressure (mmHg)    |                   |                         |
| N                                 | 3309              | 419                     |
| mean (SD)                         | 131.53 (14.40)    | 129.69 (13.69)          |
| median                            | 131.00            | 130.00                  |
| min; max                          | 90.00; 200.00     | 96.00; 171.00           |
| thrombocytes (10 <sup>9</sup> /L) |                   |                         |
| N                                 | 3269              | 419                     |
| mean (SD)                         | 240.18 (64.34)    | 244.27 (64.91)          |
| median                            | 233.00            | 242.00                  |
| min; max                          | 13.00; 611.00     | 63.00; 477.00           |
| total bilirubin (umol/L)          |                   |                         |
| N                                 | 3304              | 419                     |
| mean (SD)                         | 8.10 (4.33)       | 8.12 (4.73)             |
| median                            | 7.00              | 7.00                    |
| min; max                          | 0.00; 36.00       | 1.00; 33.00             |
| total cholesterol (mmol/L)        |                   |                         |

Continuation of Table 3

|                        | Historical sample | New random trial sample |
|------------------------|-------------------|-------------------------|
| N                      | 3284              | 410                     |
| mean (SD)              | 4.54 (1.13)       | 4.59 (1.28)             |
| median                 | 4.43              | 4.43                    |
| min; max               | 0.93; 13.93       | 2.02; 11.37             |
| triglycerides (mmol/L) |                   |                         |
| N                      | 3279              | 410                     |
| mean (SD)              | 2.07 (1.78)       | 2.23 (2.36)             |
| median                 | 1.65              | 1.70                    |
| min; max               | 0.24; 34.25       | 0.38; 27.80             |

# Appendix G Summary of categorical baseline covariates of the case study

**Tab. 4:** Summary of the continuous baseline covariates.

|                             | Historical sample |        | New random trial sample |         |
|-----------------------------|-------------------|--------|-------------------------|---------|
|                             | N                 | (%)    | N                       | (%)     |
| sample size                 | 3311              |        | 419                     |         |
| sex                         |                   |        |                         |         |
| female                      | 1480              | (44.7) | 173                     | (41.3)  |
| male                        | 1831              | (55.3) | 246                     | (58.7)  |
| race                        |                   |        |                         |         |
| Asian                       | 820               | (24.8) | 65                      | (15.5)  |
| Black or African American   | 183               | (5.5)  | < 5                     |         |
| Other                       | 67                | (2.0)  | < 5                     |         |
| White                       | 2241              | (67.7) | 346                     | (82.6)  |
| smoking status              |                   |        |                         |         |
| current                     | 241               | (7.3)  | 53                      | (12.6)  |
| never                       | 910               | (27.5) | 249                     | (59.4)  |
| previous                    | 378               | (11.4) | 116                     | (27.7)  |
| region                      |                   |        |                         |         |
| Asia                        | 748               | (22.6) | 57                      | (13.6)  |
| Europe                      | 1303              | (39.4) | 228                     | (54.4)  |
| North America               | 1015              | (30.7) | 89                      | (21.2)  |
| South Africa                | 91                | (2.7)  | 0                       |         |
| South America               | 154               | (4.7)  | 45                      | (10.7)  |
| ethnicity                   |                   |        |                         |         |
| Hispanic or Latino          | 461               | (13.9) | 68                      | (16.2)  |
| not Hispanic or Latino      | 2806              | (84.7) | 351                     | (83.8)  |
| titration target            |                   |        |                         |         |
| 3.9-5.0 mmol/l              | 410               | (12.4) | 0                       |         |
| 4.0-5.0 mmol/l              | 2236              | (67.5) | 419                     | (100.0) |
| 4.4-7.2 mmol/l              | 665               | (20.1) | 0                       |         |
| blinding                    |                   |        |                         |         |
| double-blinded              | 122               | (3.7)  | 0                       |         |
| open-label                  | 3189              | (96.3) | 419                     | (100.0) |
| Biguanides                  |                   |        |                         |         |
| yes (continued in trial)    | 2873              | (86.8) | 369                     | (88.1)  |
| yes (discontinued in trial) | 248               | (7.5)  | 27                      | (6.4)   |
| no                          | 190               | (5.7)  | 23                      | (5.5)   |
| Sulfonylureas               |                   |        |                         |         |
| yes (continued in trial)    | 436               | (13.2) | < 5                     |         |
| yes (discontinued in trial) | 1485              | (44.9) | 0                       |         |
| no                          | 1390              | (42.0) | > 414                   |         |
| DPP4                        |                   |        |                         |         |
| yes (continued in trial)    | 278               | (8.4)  | < 5                     |         |
| yes (discontinued in trial) | 361               | (10.9) | > 123                   |         |
| no                          | 2672              | (80.7) | > 285                   |         |
| other blood glucose         |                   |        |                         |         |
| lowering drugs              |                   |        |                         |         |
| yes (continued in trial)    | < 5               |        | 0                       |         |

Continuation of Table 4

|                                            | Historical sample |        | New random trial sample |         |
|--------------------------------------------|-------------------|--------|-------------------------|---------|
|                                            | N                 | (%)    | N                       | (%)     |
| yes (discontinued in trial)                | > 79              |        | 0                       |         |
| no                                         | > 3220            |        | 419                     | (100.0) |
| Alpha Glucosidase inhibitor                |                   |        |                         |         |
| yes (continued in trial)                   | 87                | (2.6)  | 0                       |         |
| yes (discontinued in trial)                | 69                | (2.1)  | 0                       |         |
| no                                         | 3155              | (95.3) | 419                     | (100.0) |
| combination of blood glucose lowering drug |                   |        |                         |         |
| yes (continued in trial)                   | 32                | (1.0)  | 0                       |         |
| yes (discontinued in trial)                | 36                | (1.1)  | 8                       | (1.9)   |
| no                                         | 3243              | (97.9) | 411                     | (98.1)  |
| Thiazolidinediones                         |                   |        |                         |         |
| yes (continued in trial)                   | 78                | (2.4)  | 20                      | (4.8)   |
| yes (discontinued in trial)                | 29                | (0.9)  | 0                       |         |
| no                                         | 3204              | (96.8) | 399                     | (95.2)  |
| SGLT2i                                     |                   |        |                         |         |
| yes (continued in trial)                   | 175               | (5.3)  | > 383                   |         |
| yes (discontinued in trial)                | 15                | (0.5)  | > 25                    |         |
| no                                         | 3121              | (94.3) | < 5                     |         |
| GLP-1 receptor agonist                     |                   |        |                         |         |
| yes (continued in trial)                   | 79                | (2.4)  | 0                       |         |
| yes (discontinued in trial)                | 13                | (0.4)  | 0                       |         |
| no                                         | 3219              | (97.2) | 419                     | (100.0) |

## Appendix H Missing pattern of the case study

To clean and curate the 14 data sets we imputed the HbA1C at week 26 value. For the historical sample the imputation was made using an ANCOVA model with last observed HbA1C measurement before landmark visit, time point of last measurement, baseline HbA1C, discontinuation prior to week 26 indicator and study-id as adjustment covariates. For the new trial data a similar approach was employed. However, in this case the last observed HbA1C measurement before landmark visit week 26, time point of last measurement, baseline HbA1C, discontinuation prior to week 26 indicator, region, treatment indicator and pre-study OADs were used as adjustment covariates. This was done in order to use a similar imputation as used in the original analysis.

After imputing the HbA1C at week 26 value a total 94.4% of the participants had complete data for the combined historical and new trial data. The missingness of the covariates is displayed below. For the covariates we included missingness indicators and respectively imputed covariates using random forest (2). This was done seperately on the historical and new trial data. The normalized root mean square error was 0.218 for continuous covariates and proportion of falsely classified is 0.004 for the historical data sample. The normalized root mean square error was 0.010 for continuous covariates and proportion of falsely classified is 0.023 for the new trial data. The missingness indicators of the historical sample did all overlap with the missingness indicators from NN9068-4229 trial. Since some of the covariates had near zero variance, were colinear or had large absolute correlation with each other we removed some of the covariates.

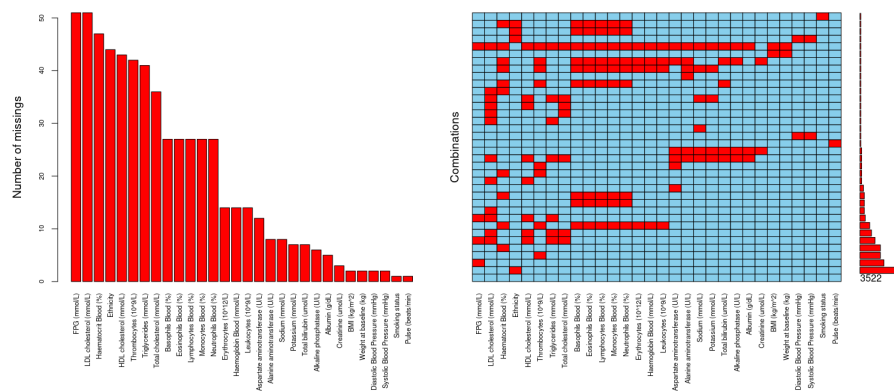

**Fig. 2:** Number of missing covariates (left) and combination of missingness of covariates (right).

Due to near zero variance, collinearity or high absolute correlation between the covariates, we excluded some of the values. Thus the baseline covariates used in the model where reduced to the following:

- age
  - diabetes duration
  - body mass index
  - HbA1C
  - height
  - weight
- Alanine aminotransferase
  - Albumin
  - Alkaline phosphatase
  - Aspartate aminotransferase
  - Basophils
  - Creatinine

- Eosinophils
- Erythrocytes
- fasting plasma glucose
- Haematocrit
- HDL cholesterol
- LDL cholesterol
- Leukocytes
- Lymphocytes
- Monocytes
- Potassium
- Sodium
- Thrombocytes
- Total bilirubin
- Total cholesterol
- Triglycerides
- Diastolic blood pressure
- pulse
- Systolic blood pressure
- country
- sex
- race
- smoking status
- region
- ethnicity
- Biguanides
- DPP4
- SGLT2I
- Previous OADs



## Appendix I Case study prognostic score

A linear model was chosen by the super learner for the prognostic score. The explicit form is stated below with all the covariates being found at the baseline visit:

8.064 - 0.005803 \* age + 0.006858 \* duration of diabetes (years) - 0.04832 baseline body mass index - 0.6984 baseline HbA1c - 1.597 \* baseline height + 0.01584 \* baseline weight - 0.0001571 \* Alanine aminotransferase - 0.1717 \* Albumin - 0.001101 \* Alkaline phosphatase + 0.0007458 \* Aspartate aminotransferase + 0.01894 \* Basophils + 0.0001417 \* Creatinine + 0.00002099 \* Eosinophils + 0.07384 \* Erythrocytes - 0.003852 \* Fasting plasma glucose - 0.01072 \* Haematocrit + 0.1456 \* HDL cholesterol - 0.02274 \* LDL cholesterol + 0.009920 \* Leukocytes + 0.002362 \* Lymphocytes + 0.001950 \* Monocytes + 0.01634 \* Potassium + 0.001422 \* Sodium + 0.0003064 \* Thrombocytes - 0.01402 \* Bilirubin - 0.009623 \* Cholesterol + 0.01402 \* Triglycerides - 0.001623 \* Diastolic blood pressure + 0.0003186 \* Pulse - 0.0003957 \* Systolic blood pressure - 0.09003 \* Canada - 0.2896 \* Spain - 0.1609 \* Finland - 0.1386 \* Hungary + 0.1513 \* India + 0.1667 \* Russia - 0.04964 \* Slovakia - 0.1002 \* Slovenia + 0.01340 \* USA + 0.05908 \* Male - 0.1359 \* Race white - 0.07616 \* current smoker + 0.01871 \* never smoked - 0.05815 \* previous smoker + 0.1683 \* Europe - 0.1080 \* ethnicity not Hispanic or Latino + 0.005146 \* Biguanides discontinued + 0.05303 \* no Biguanides used + 0.07725 \* Dipeptidyl peptidase-4 inhibitor discontinued. The covariates are not demeaned. All the categories of the categorical variables included in the model have a main term, meaning that there is no reference group.

## References

- [1] Morris TP, White IR, Crowther MJ. Using simulation studies to evaluate statistical methods. *Statistics in medicine*. 2019;38(11):2074–102.
- [2] Stekhoven DJ, Bühlmann P. MissForest—non-parametric missing value imputation for mixed-type data. *Bioinformatics*. 2012;28(1):112–8.
